# Supplementary material for: Constitutive IKK2 activation in intestinal epithelial cells induces intestinal tumors in mice
Source: JCI journal article supplement (doi:10.1172/jci45349), 2011-06-23
Supplement: sd1 [file 1]

**A**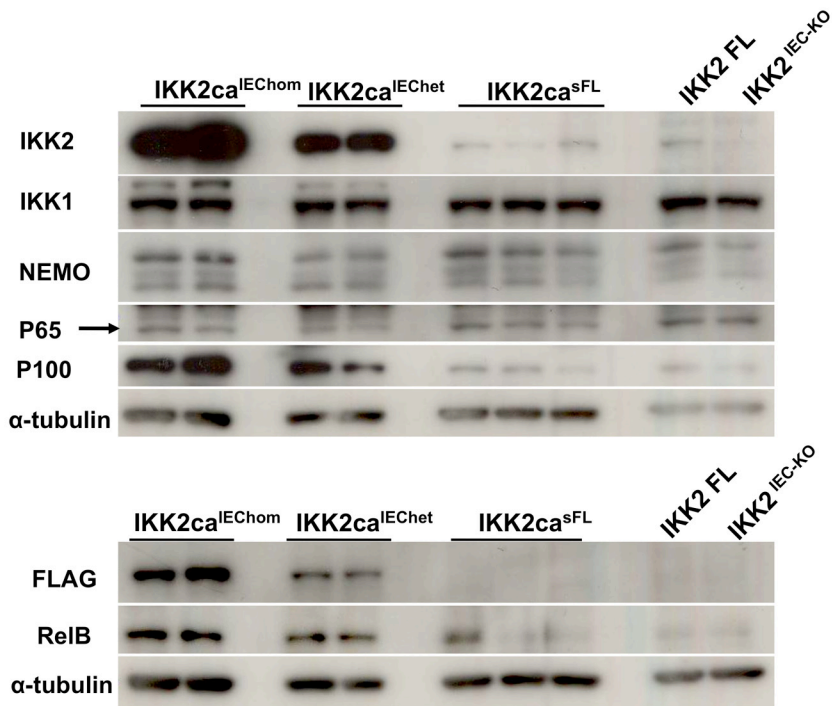**B**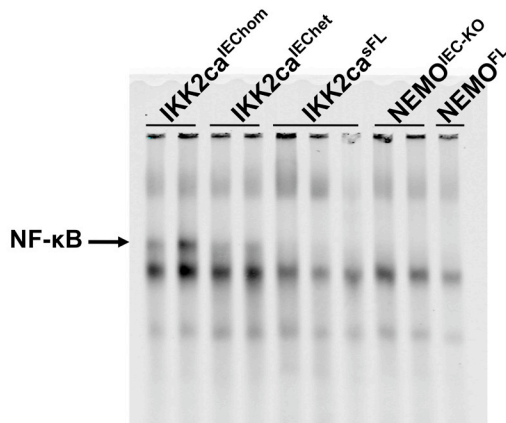**Supplementary Figure 1****Comparison of expression levels of IKK2 and NF- $\kappa$ B pathway components in IECs from IKK2ca<sup>IEChom</sup> and IKK2ca<sup>IEChet</sup> mice**

**A.** WB analysis of protein extracts from small intestinal IECs depict IKK2 and IKK2ca only (anti-FLAG) in IKK2ca<sup>IEChom</sup> and IKK2ca<sup>IEChet</sup> mice. No difference in IKK1 or NEMO protein were detectable between genotypes. The protein abundance of RelB and p100, both targets of NF- $\kappa$ B regulated transcription, was elevated in both IKK2ca<sup>IEChom</sup> and IKK2ca<sup>IEChet</sup> mice.

**B.** EMSA performed with nuclear extracts from small intestinal IECs reveals increased NF- $\kappa$ B DNA-binding activity in IECs from IKK2ca<sup>IEChom</sup> and IKK2ca<sup>IEChet</sup> mice, as indicated by a shift in the NF- $\kappa$ B probe (marked by an arrow).

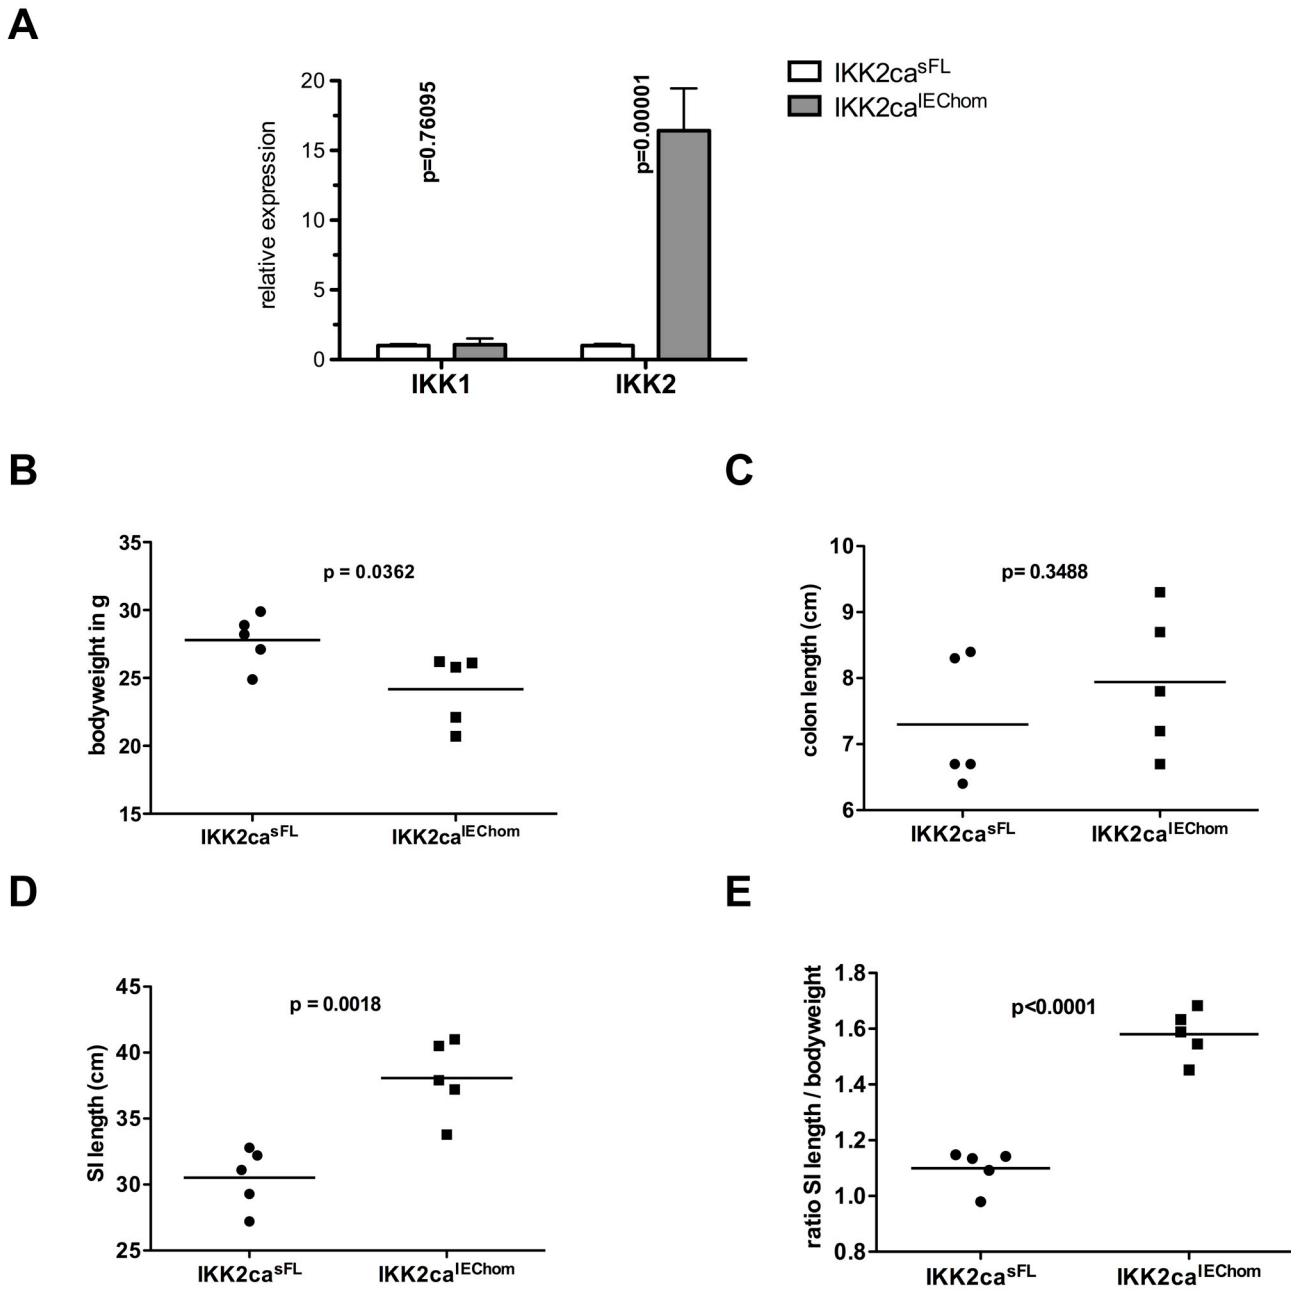

### Supplementary Figure 2

#### Expression of IKK2, body weight and intestinal length of IKK2ca<sup>IEChom</sup> mice

**A.** Quantitative RT-PCR showing elevated expression of IKK2 in colon IECs of IKK2ca<sup>IEChom</sup> mice whereas IKK1 was not differentially expressed between genotypes (n = 5 per genotype; mRNA levels are presented as mean values  $\pm$  SD).

**B.** Reduced body weight of male IKK2ca<sup>IEChom</sup> mice at 10 weeks of age (n = 5 per genotype; horizontal line represents mean value).

**C.** No statistically significant difference in colon lengths was observed between IKK2ca<sup>sFL</sup> and IKK2ca<sup>IEChom</sup> male mice at 10 weeks of age (n = 5 per genotype; horizontal line represents mean value).

**D.** The length of the small intestine was significantly longer in the same 10 week old male IKK2ca<sup>IEChom</sup> mice when compared to IKK2ca<sup>sFL</sup> animals (n = 5 per genotype; horizontal line represents mean value).

**E.** The relative length of the small intestine compared to the body weight of each mouse was significantly higher in IKK2ca<sup>IEChom</sup> mice (n = 5 per genotype; horizontal line represents mean value)

**A**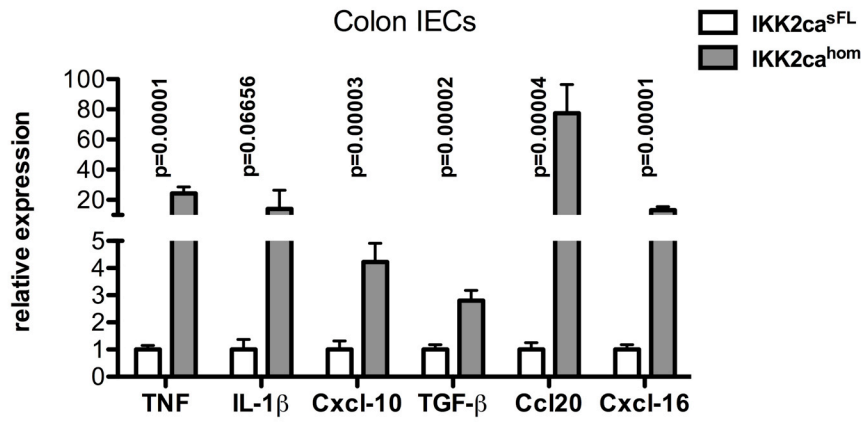**B**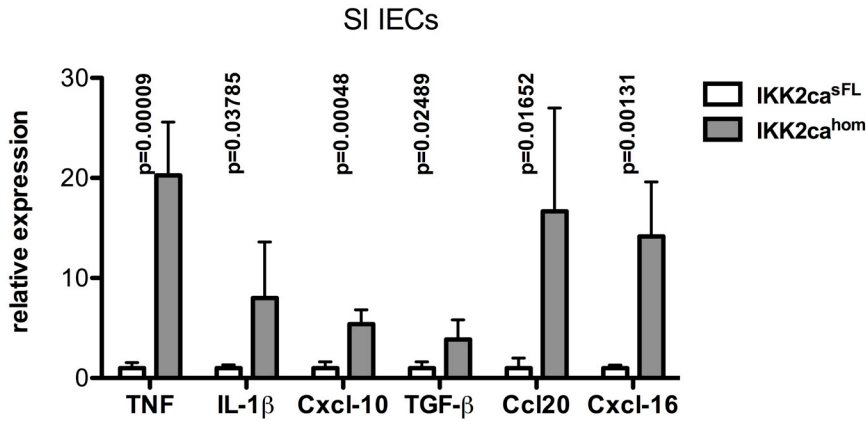**C**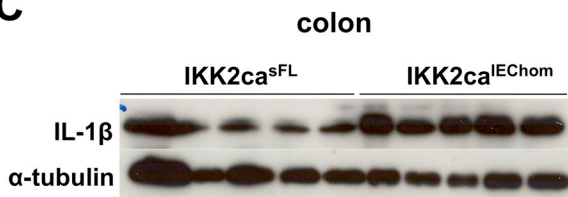**D**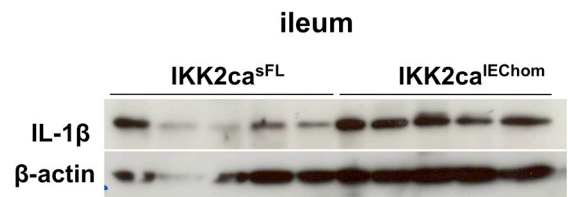**Supplementary Figure 3****Production of inflammatory mediators by intestinal epithelial cells of IKK2ca<sup>IEChom</sup> mice**

**A.** Quantitative RT-PCR analysis shows significantly elevated expression levels of inflammatory mediators in colonic IECs from 8-week-old IKK2ca<sup>IEChom</sup> animals. (n=5 per genotype; mRNA levels are presented as mean ± SD)

**B.** Inflammatory molecules are expressed at higher levels in primary small intestinal IECs derived from IKK2ca<sup>IEChom</sup> mice when compared SI IECs from IKK2ca<sup>SFL</sup> control animals. (n=5 per genotype; mRNA levels are presented as mean ± SD)

**C.** WB analysis for IL-1β on whole colon tissue extracts indicating an increased abundance of IL-1β protein in the colon of IKK2ca<sup>IEChom</sup> mice.

**D.** Increased amount of IL-1β protein in ileal extracts derived from IKK2ca<sup>IEChom</sup> mice as assessed by WB analysis.

**A**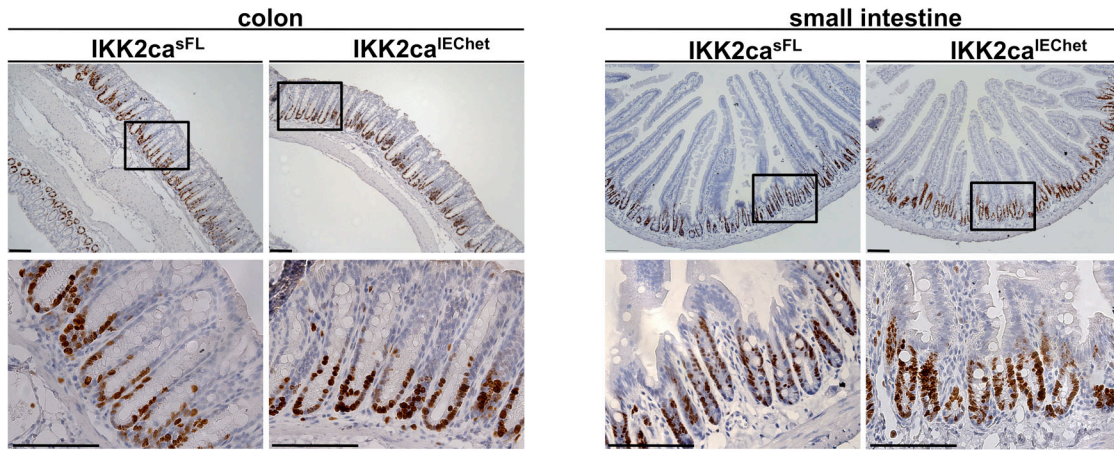**B**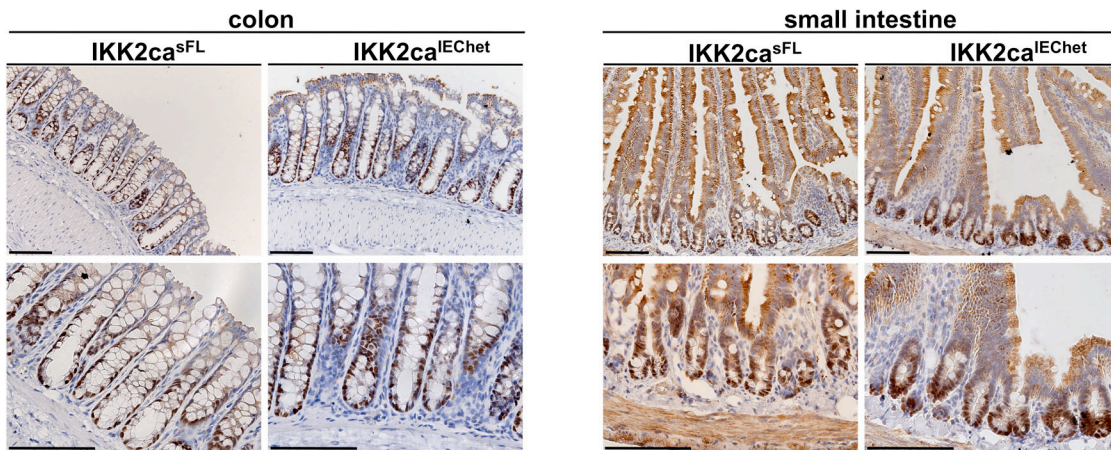**Supplementary Figure 4****No differences in Ki67 and Sox9 expression in IECs between  $IKK2ca^{sFL}$  and  $IKK2ca^{IEChet}$  mice**

**A.** Ki67 immunohistochemical staining of sections from the colon and SI of 4-month-old animals did not reveal considerable differences between  $IKK2ca^{IEChet}$  and  $IKK2ca^{sFL}$  mice, consistent with the normal histology of these tissues as shown in figure 5B.

**B.** Sox9 immunohistochemical staining of sections from the colon and SI of 4-month-old animals did not reveal considerable differences between  $IKK2ca^{IEChet}$  and  $IKK2ca^{sFL}$  mice, consistent with the normal histology of these tissues as shown in figure 5B.

**A**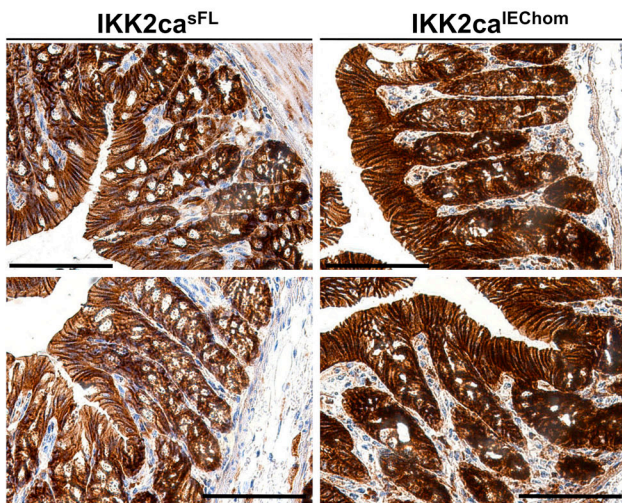**B**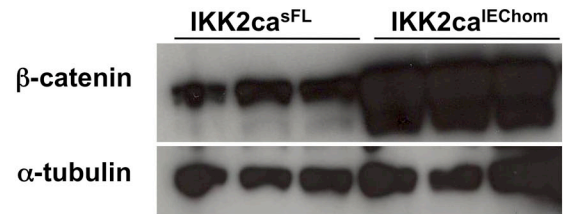**C**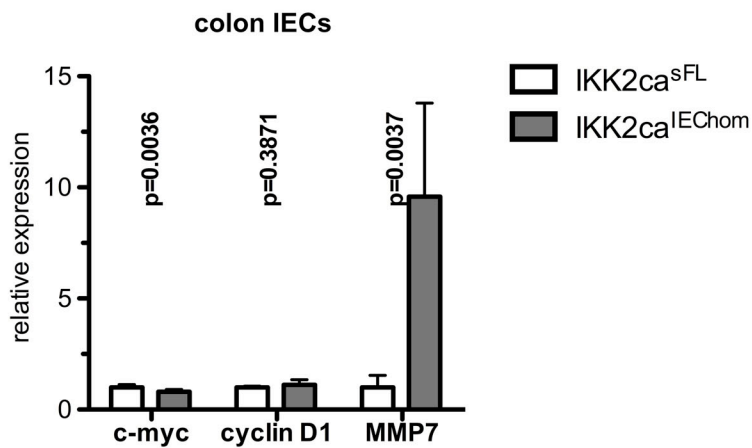**Supplementary Figure 5****Increased β-catenin levels in IKK2ca<sup>IEChom</sup> mice**

**A.** Immunohistochemical staining showing increased abundance of β-catenin protein in the colonic epithelium of 9-week-old IKK2ca<sup>IEChom</sup> mice when compared to IKK2ca<sup>FL</sup> littermates. Pictures shown were taken from sections of IKK2ca<sup>FL</sup> and IKK2ca<sup>IEChom</sup> colons that were cut at the same thickness and were placed on the same glass slides to make sure identical conditions were used for the staining.

**B.** Immunoblot analysis of protein extracts from small intestinal IECs from IKK2ca<sup>IEChom</sup> mice revealed higher levels of β-catenin compared to IKK2ca<sup>FL</sup> IECs.

**C.** Quantitative RT-PCR analysis of selected Wnt target genes in colon IECs from IKK2ca<sup>FL</sup> and IKK2ca<sup>IEChom</sup> mice. (mRNA levels are presented as mean ± SD; n=5 per genotype).

All scale bars represent 50 μm.
